# Supplementary material for: Efficient synthesis of oligofluoranthene nanorods with tunable functionalities
Source: Royal Society of Chemistry journal article supplement (doi:10.1039/c5sc03041b), 2015-01-01
Supplement: c5sc03041b1.pdf [file c5sc03041b1.pdf]

# Chemical Science

2015, 6, DOI: 10.1039/c5sc03041b

## Electronic supplementary information

### Efficient synthesis of oligofluoranthene nanorods with tunable functionalities

Xin-Gui Li,<sup>‡\*ab</sup> Yaozu Liao,<sup>‡abc</sup> Mei-Rong Huang<sup>\*ab</sup> and Richard B. Kaner<sup>\*bd</sup>

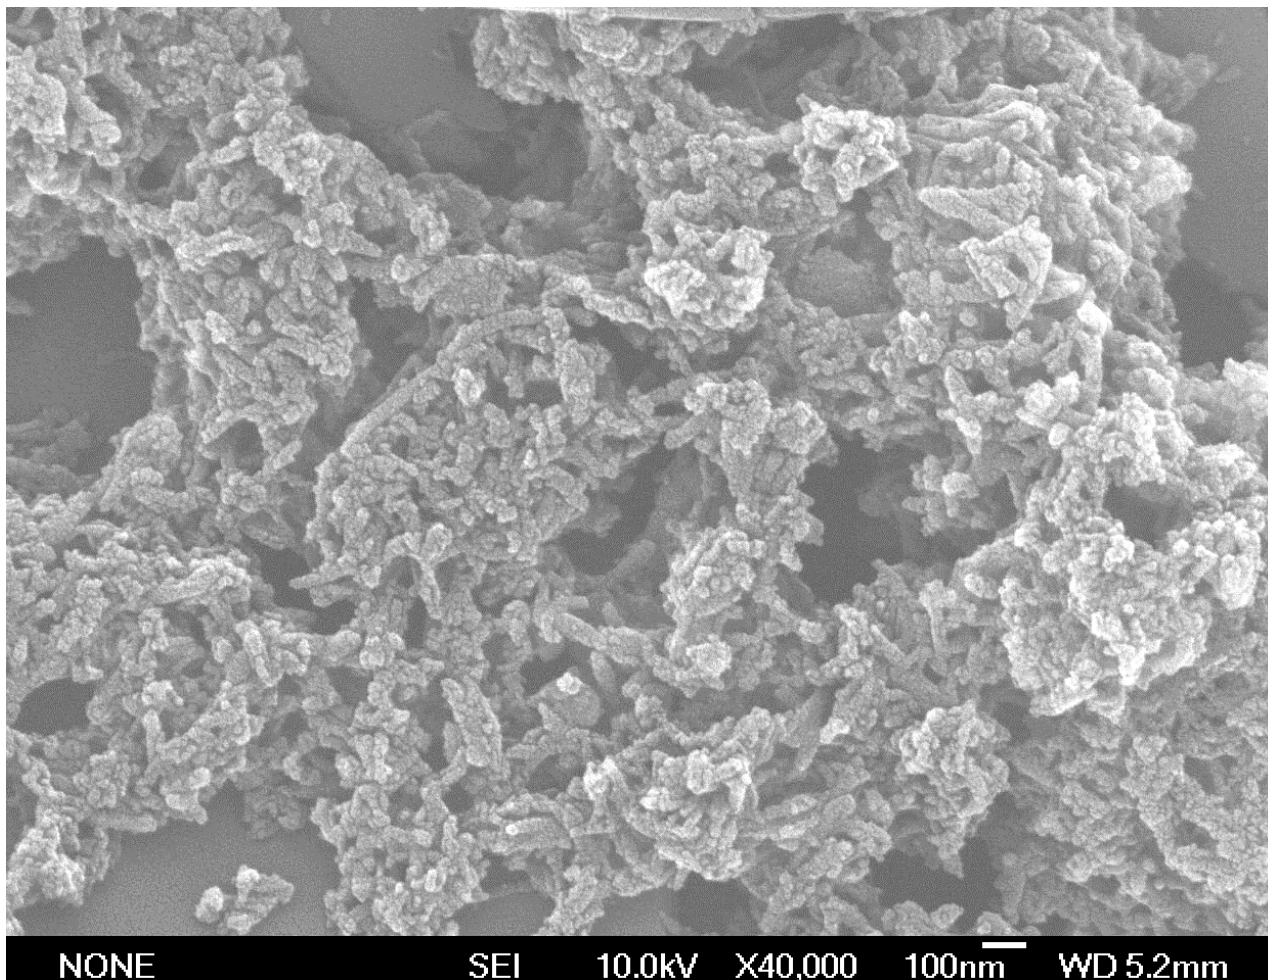

(a) FeCl<sub>3</sub>/FA molar ratio: 5/1

<sup>a</sup>State Key Laboratory of Pollution Control and Resource Reuse, College of Environmental Science and Engineering, Tongji University, Shanghai 200092, China. E-mail: adamxgli@yahoo.com; huangmeirong@tongji.edu.cn.

<sup>b</sup>Department of Chemistry & Biochemistry, California NanoSystems Institute, University of California, Los Angeles, Los Angeles, California 90095, USA. E-mail: kaner@chem.ucla.edu; Fax: +1 310 206 4038; Tel: +1 310 825 5346.

<sup>c</sup>State Key Laboratory for Modification of Chemical Fibers and Polymer Materials, College of Materials Science and Engineering, Donghua University, Shanghai 201620, P. R. China

<sup>d</sup>Department of Materials Science & Engineering, University of California, Los Angeles, Los Angeles, California 90095, USA

<sup>‡</sup> X.-G. Li and Y.Z. Liao contributed equally to this work.

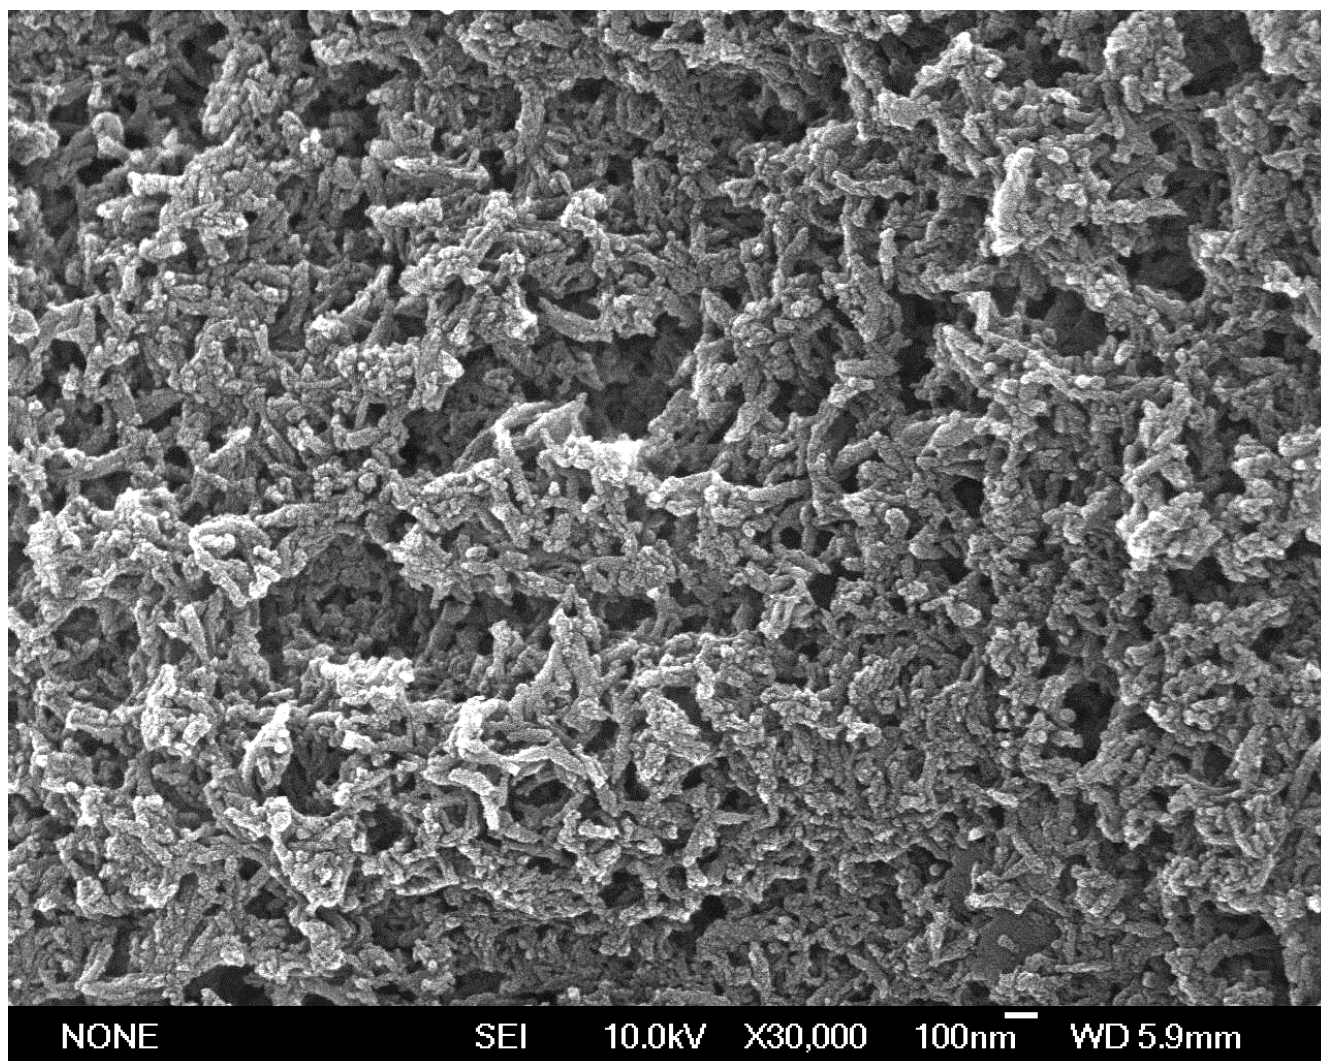

**(b)**  $\text{FeCl}_3/\text{FA}$  molar ratio: 9/1



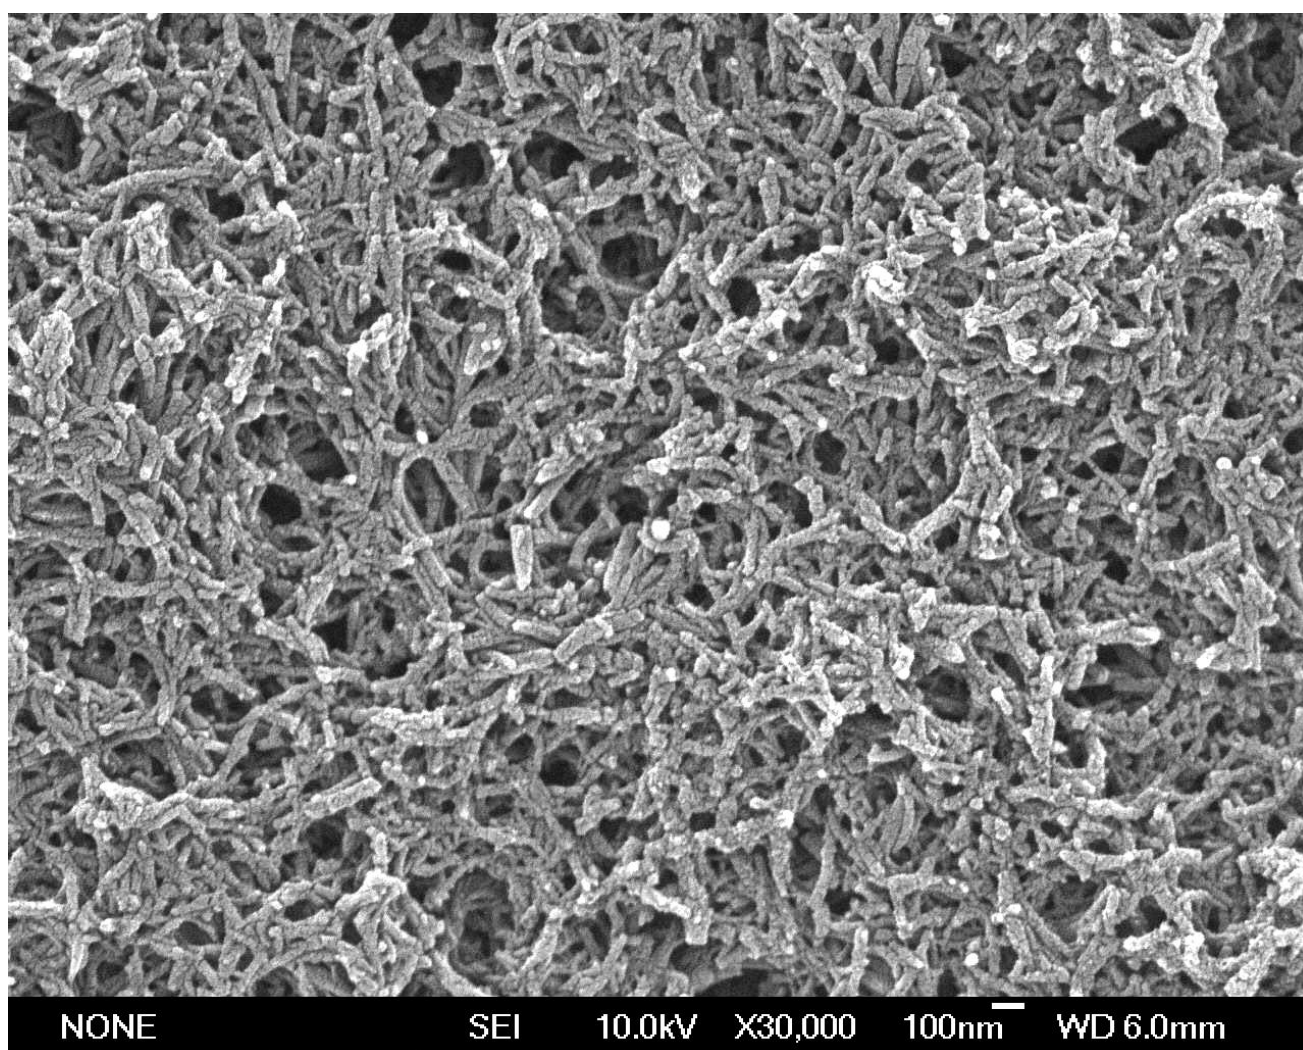

**(c)**  $\text{FeCl}_3/\text{FA}$  molar ratio: 12/1

**Figure S1.** SEM images of OFA nanorods synthesized with  $\text{FeCl}_3/\text{FA}$  molar ratios: **(a)** 5/1, **(b)** 9/1, and **(c)** 12/1.
